# Supplementary material for: Metabolic characteristics of solid pseudopapillary neoplasms of the pancreas: their relationships with high intensity 18F-FDG PET images
Source: PubMed Central journal article supplement (PMC5844725; doi:10.18632/oncotarget.23846), 2018-01-03
Supplement: oncotarget-09-12009-s001.pdf [file oncotarget-09-12009-s001.pdf]

## Metabolic characteristics of solid pseudopapillary neoplasms of the pancreas: their relationships with high intensity $^{18}\text{F}$ -FDG PET images

### SUPPLEMENTARY MATERIALS

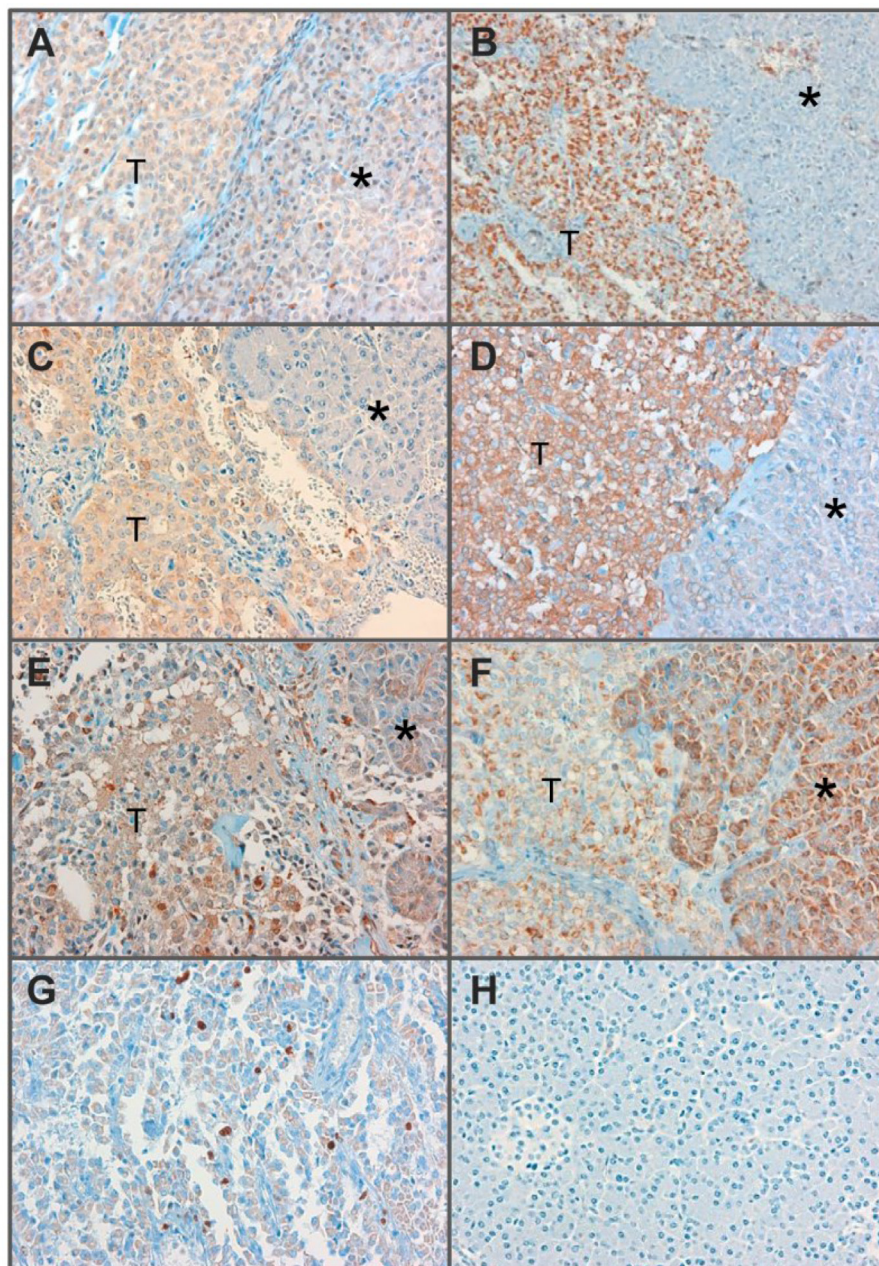

**Supplementary Figure 1: Immunohistochemical analysis of glucose metabolism related genes.** Expression of GLUT1 (A), HK1 (B), ENO2 (C), PKM2 (D), LDHA (E), PDHD (F), and Ki-67 in SPN (G), and Ki-67 in normal acinar cells (H). Note that \* indicates area of normal acinar cells, and T indicates tumor area of SPN.

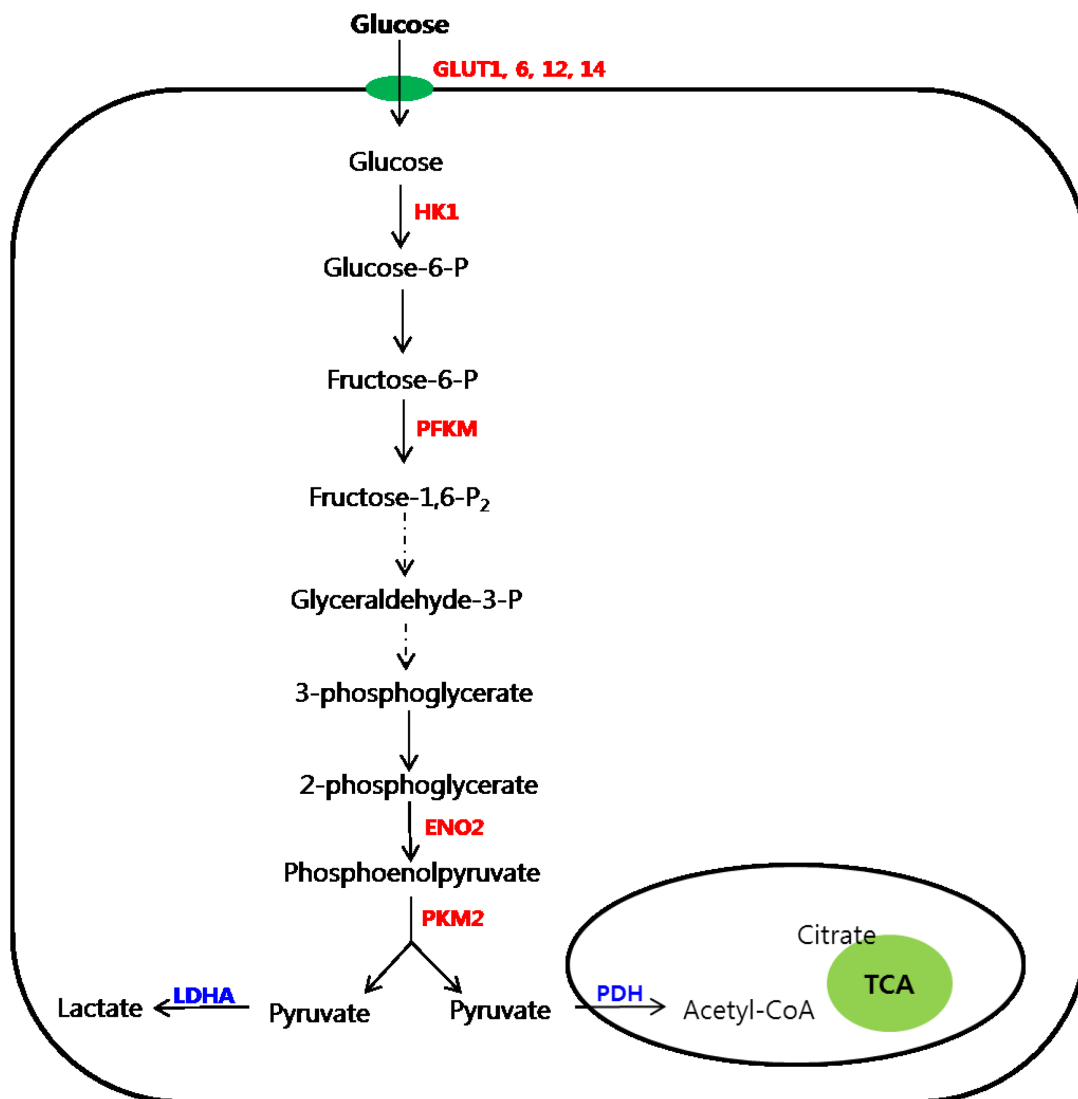

**Supplementary Figure 2: Schematic summary of gene expression profiles for glucose metabolism in SPN of the pancreas.** GLUT1, GLUT6, GLUT12, and GLUT14 were highly expressed in SPN compared to normal pancreatic tissue. HK1 was strongly overexpressed in SPN of the pancreas compared with PCA. PFKM (phosphofructokinase, muscle), ENO2 (enolase-2), and PKM2 (pyruvate kinase) were also significantly overexpressed in SPN of the pancreas. However, unlike pancreatic cancer, the expression of PDHB (pyruvate dehydrogenase beta) and LDHA (lactate dehydrogenase A) in SPN were similar in normal pancreatic tissue.

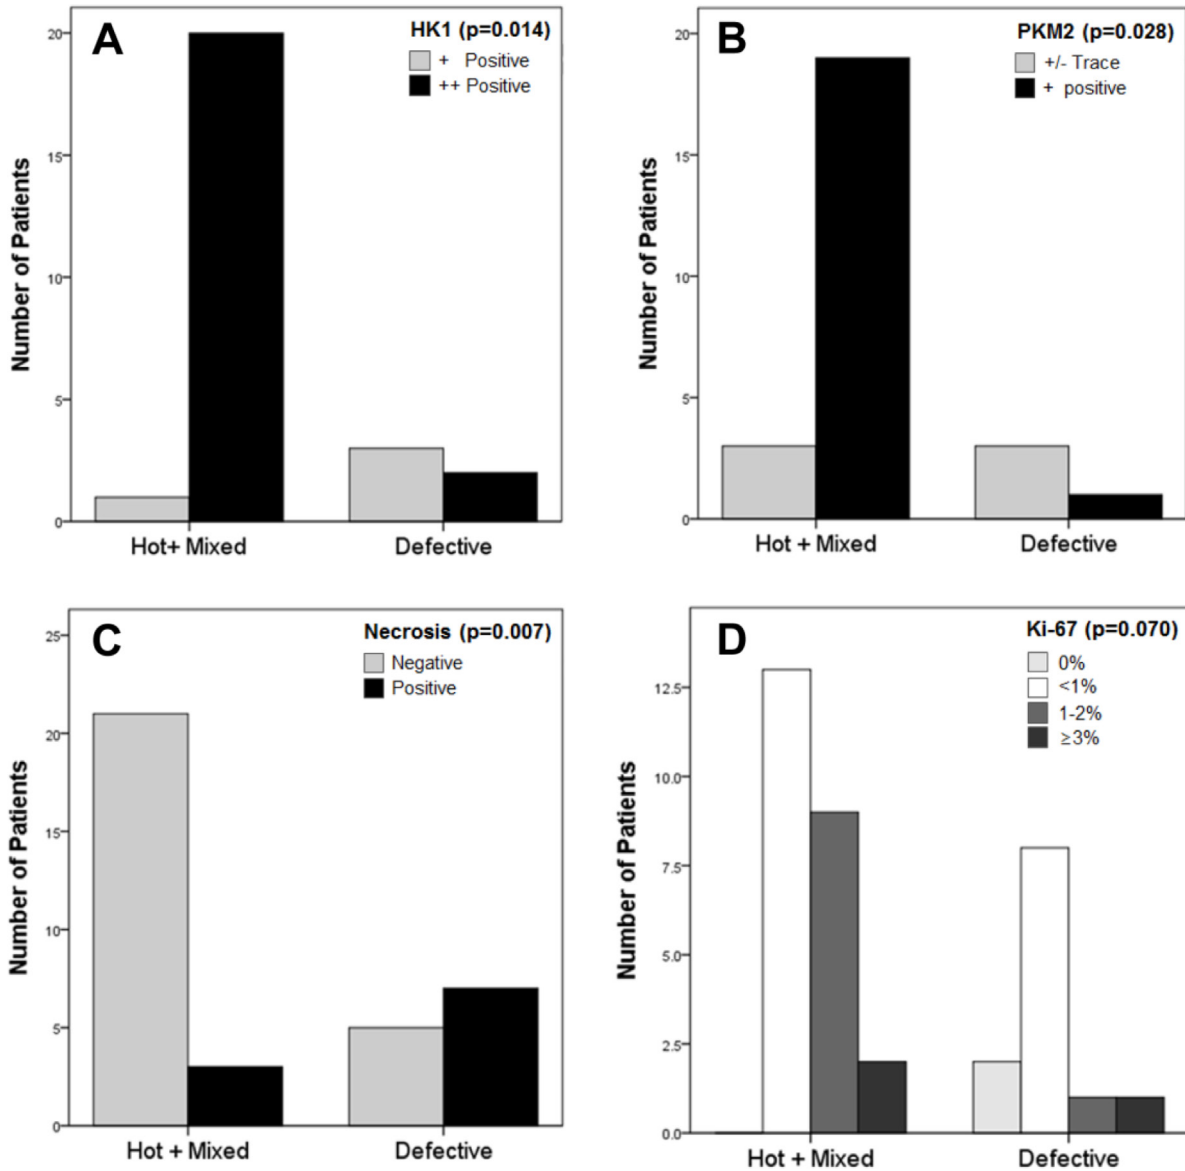

**Supplementary Figure 3: Comparison between HK1, PKM2, Ki-67 expression and necrosis according to the pattern of <sup>18</sup>F<sub>2</sub>FDG-uptake.** Expression of HK1 and PKM2 decreased in defective pattern, comparing with hot and mixed patterns (A and B). Intratumoral necrosis was significantly associated with defective type SPNs (C). Defective type had a tendency to show lower proliferation power, compared with hot and mixed SPNs (D).

**Supplementary Table 1: Correlation between pattern of <sup>18</sup>FDG uptake and radiologic PET-parameters**

| Type               | Proportion of <sup>18</sup> FDG uptake | Age (years)              | Radiologic Tumor Size (cm) | SUVmax (g/cm <sup>3</sup> ) | MTV2.5 (cm <sup>3</sup> ) |
|--------------------|----------------------------------------|--------------------------|----------------------------|-----------------------------|---------------------------|
| Hot (n = 19)       | 70% ≤                                  | 36.3 ± 10.8 <sup>a</sup> | 3.4 ± 2.2 <sup>a</sup>     | 5.2 ± 2.8 <sup>a</sup>      | 34.4 ± 69.9 <sup>a</sup>  |
| Mixed (n = 5)      | 30 ≤ < 70%                             | 25.2 ± 13.9 <sup>a</sup> | 8.4 ± 3.6 <sup>b</sup>     | 11.1 ± 7.1 <sup>b</sup>     | 55.7 ± 64.4 <sup>a</sup>  |
| Defective (n = 12) | < 30%                                  | 33.4 ± 9.8 <sup>a</sup>  | 5.6 ± 2.0 <sup>a</sup>     | 3.6 ± 2.3 <sup>a</sup>      | 16.8 ± 35.7 <sup>a</sup>  |
| <i>p-value</i>     |                                        | 0.146                    | 0.002                      | 0.001                       | 0.462                     |

<sup>1</sup>Statistical significances were tested by one-way analysis of variances (ANOVA) among groups. <sup>2</sup>The same letters (a, or b) in same column indicate non-significant differences between groups based on Turkey's multiple comparison test

**Supplementary Table 2: Expression of glucose metabolism-related genes in SPN and PCA**

| Gene symbol      | Gene ID | Gene description                                                      | Fold change (Tumor / Normal) |              |       |              |
|------------------|---------|-----------------------------------------------------------------------|------------------------------|--------------|-------|--------------|
|                  |         |                                                                       | SPN                          | <i>p-val</i> | PCA   | <i>p-val</i> |
| CTNNB1           | 3091    | catenin (cadherin-associated protein), beta 1                         | 4.38                         | 0.003        | 1.70  | 0.398        |
| SLC2A1 [GLUT1]   | 6513    | solute carrier family 2 (facilitated glucose transporter), member 1   | 2.22                         | 0.012        | 11.01 | < 0.001      |
| SLC2A6 [GLUT6]   | 11182   | solute carrier family 2 (facilitated glucose transporter), member 6   | 2.47                         | 0.031        | 2.12  | 0.035        |
| SLC2A12 [GLUT12] | 154091  | solute carrier family 2 (facilitated glucose transporter), member 12, | 19.82                        | < 0.001      | 2.13  | 0.067        |
| SLC2A14 [GLUT14] | 144195  | solute carrier family 2 (facilitated glucose transporter), member 14  | 2.60                         | 0.008        | 2.55  | 0.027        |
| HK1              | 3098    | hexokinase 1                                                          | 7.01                         | < 0.001      | 3.72  | 0.006        |
| HK2              | 3099    | hexokinase 2                                                          | 1.97                         | 0.384        | 4.87  | 0.002        |
| HK3              | 3101    | hexokinase 3                                                          | -1.09                        | 0.915        | 1.28  | 0.37         |
| PFKM             | 5213    | phosphofructokinase, muscle                                           | 5.35                         | < 0.001      | 3.68  | 0.001        |
| ENO1             | 2023    | Enolase 1                                                             | -1.12                        | 0.921        | 2.61  | < 0.001      |
| ENO2             | 2026    | Enolase 2                                                             | 21.11                        | < 0.001      | 9.02  | < 0.001      |
| ENO3             | 2027    | Enolase 3                                                             | 1.56                         | 0.085        | 1.34  | 0.372        |
| PKM2             | 5315    | pyruvate kinase, muscle                                               | 6.28                         | < 0.001      | 3.68  | 0.001        |
| PDHB             | 5162    | pyruvate dehydrogenase (lipoamide) beta                               | 1.10                         | 0.852        | -1.14 | 0.370        |
| LDHA             | 3939    | lactate dehydrogenase A                                               | -1.30                        | 0.601        | 2.97  | 0.002        |

**Supplementary Table 3: Immunohistochemical analysis of glucose metabolism-related genes in five PCA patients**

| # | GLUT1 | HK1 | ENO2 | PKM2 | PDH | LDHA | Ki-67 |
|---|-------|-----|------|------|-----|------|-------|
| 1 | +     | +   | -    | +++  | +   | ++   | 30%   |
| 2 | +     | -   | -    | +++  | +   | ++   | 8%    |
| 3 | -     | -   | -    | +++  | +   | ++   | 20%   |
| 4 | +     | -   | -    | ++   | +   | ++   | 30%   |
| 5 | +     | -   | -    | ++   | +   | ++   | 30%   |

PCA; pancreatic ductal adenocarcinoma

**Supplementary Table 4: Correlation between staining intensity of glucose metabolism-related genes and pattern of <sup>18</sup>FDG-uptake pattern in SPNs**

|          |     | Clinical patterns of <sup>18</sup> FDG-uptake |           | P-value |
|----------|-----|-----------------------------------------------|-----------|---------|
|          |     | Hot and Mixed                                 | Defective |         |
| GLUT1    | -   | 4                                             | 1         | 0.646   |
|          | +   | 20                                            | 11        |         |
| HK1      | +   | 1                                             | 3         | 0.014   |
|          | ++  | 20                                            | 2         |         |
| PKM2     | +/- | 3                                             | 3         | 0.028   |
|          | +   | 19                                            | 1         |         |
| Necrosis | -   | 21                                            | 5         | 0.007   |
|          | +   | 3                                             | 7         |         |
|          | 0   | 0                                             | 2         |         |
| Ki-67    | < 1 | 13                                            | 8         | 0.070   |
|          | 1-2 | 9                                             | 1         |         |
|          | 3 ≤ | 2                                             | 1         |         |
